# Supplementary material for: Barium zirconate: a new photocatalyst for converting CO2 into hydrocarbons under UV irradiation
Source: Royal Society of Chemistry journal article supplement (doi:10.1039/c4cy01201a), 2014-12-15
Supplement: c4cy01201a1.pdf [file c4cy01201a1.pdf]

## Supporting Information

### Barium zirconate: a new photocatalyst for converting CO<sub>2</sub> into hydrocarbons under UV irradiation

Xianliu Chen <sup>a</sup>, Jun Wang <sup>a</sup>, Chunxiang Huang <sup>a</sup>, Shiyong Zhang <sup>b</sup>, Haitao Zhang <sup>c</sup>,  
Zhaosheng Li <sup>a,\*</sup>, Zhigang Zou <sup>a</sup>

<sup>a</sup> National Laboratory of Solid State Microstructures, Collaborative Innovation Center of Advanced Microstructures, College of Engineering and Applied Science, Ecomaterials and Renewable Energy Research Center, Nanjing University, No. 22 Hankou Road, Nanjing 210093, People's Republic of China.

<sup>b</sup> Hunan Key Laboratory of Applied Environmental Photocatalysis, Changsa University, Changsa, People's Republic of China

<sup>c</sup> School of Chemistry and Chemical Engineering, University of Jinan, Jinan, People's Republic of China

\*Corresponding author. E-mail addresses: zsli@nju.edu.cn

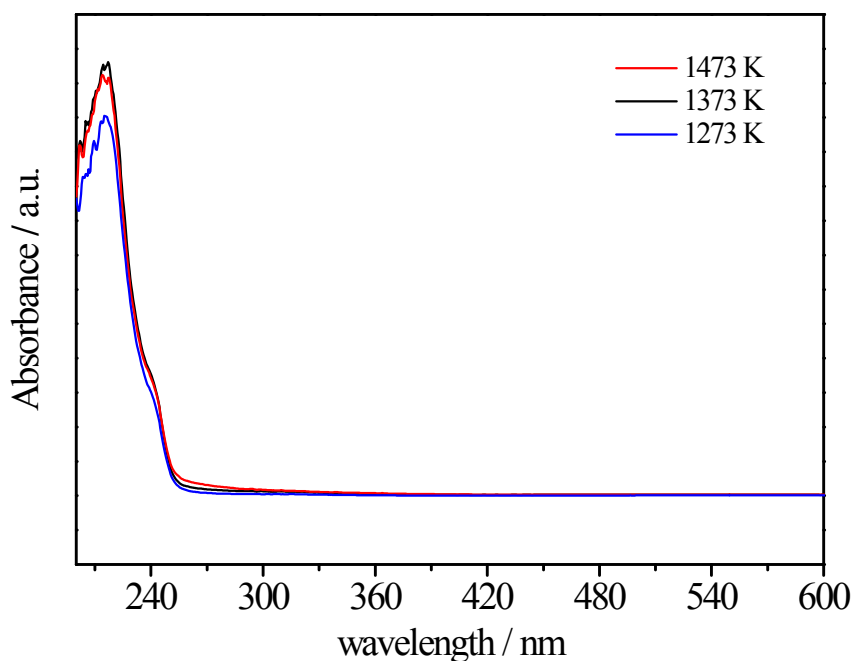

Fig.S1. The UV-vis patterns of BaZrO<sub>3</sub> derived at different temperature.

By processing the UV-vis spectra data of BaZrO<sub>3</sub> with the Kubelka-Munk method, the diffuse reflectance spectra data was converted to the

absorbance. And the absorption edge of all the BaZrO<sub>3</sub> samples is around 260 nm which indicates BaZrO<sub>3</sub> is a wide-band gap semiconductor. As shown in Fig. S1, the absorption edge had no obvious change as the calcinations temperature increased. The band gap of the samples was around 4.8 eV.
